# Supplementary material
Source: PubMed Central journal article supplement (PMC9474600)
Supplement: NIHMS1825836-supplement-Table_s1.pdf [file NIHMS1825836-supplement-Table_s1.pdf]

Table S1 – Cryo-EM data collection, processing, model refinement and validation – related to Figures 1, S2 and S3

|                                             | A/New Caledonia/20/99 + 310-<br>39G10 Fab | A/New Caledonia/20/99 + 310-<br>63E6 Fab |
|---------------------------------------------|-------------------------------------------|------------------------------------------|
| Microscope                                  | Talos Arctica                             | Talos Arctica                            |
| Voltage (kV)                                | 200                                       | 200                                      |
| Detector                                    | Gatan K2 Summit                           | Gatan K2 Summit                          |
| Recording mode                              | Counting                                  | Counting                                 |
| Magnification                               | 36,000                                    | 36,000                                   |
| Movie micrograph pixel size                 | 1.15                                      | 1.15                                     |
| No. of frames per movie micrograph          | 36                                        | 36                                       |
| Frame exposure (ms)                         | 250                                       | 250                                      |
| Movie micrograph exposure time (s)          | 9.02                                      | 9.02                                     |
| Total dose (e-/Å <sup>2</sup> )             | 49.88                                     | 49.88                                    |
| Grid type                                   | UltrAuFoil R 1.2/1.3                      | UltrAuFoil R 1.2/1.3                     |
| focus range (um)                            | -0.7 - 1.4                                | -0.6 - 1.3                               |
| Number of movie micrographs                 | 853                                       | 958                                      |
| Number of particles picked                  | 323,979                                   | 590,972                                  |
| Number of particles after 2D classification | 219,060                                   | 204,274                                  |
| Particles in the final map                  | 135,198                                   | 123,683                                  |
| Map symmetry                                | C3                                        | C3                                       |
| Map sharpening B-factor                     | -49.18                                    | -52.67                                   |
| Map resolution (Å)                          | 3.37                                      | 3.09                                     |
| EMDB ID                                     | EMD-25040                                 | EMD-25039                                |
| Residues                                    | 2,175                                     | 2,160                                    |
| Amino acids                                 | 2,157                                     | 2,145                                    |
| Carbohydrates                               | 18                                        | 15                                       |
| RMSD Bonds (4σ)                             | 0.021                                     | 0.021                                    |
| RMSD Angles (4σ)                            | 1.711                                     | 1.775                                    |
| Ramachandran                                |                                           |                                          |
| Outliers (%)                                | 0                                         | 0                                        |
| Allowed (%)                                 | 1.41                                      | 1.56                                     |
| Favored (%)                                 | 98.59                                     | 98.44                                    |
| Rotamer outliers (%)                        | 0                                         | 0                                        |
| Clash score                                 | 0.98                                      | 1.43                                     |
| Molprobit score                             | 0.79                                      | 0.88                                     |
| EMRinger score                              | 3.79                                      | 4.67                                     |
| PDB ID                                      | 7SCO                                      | 7SCN                                     |
