# Supplementary material
Source: PubMed Central journal article supplement (PMC9474600)
Supplement: NIHMS1825836-supplement-Table_s2.pdf [file NIHMS1825836-supplement-Table_s2.pdf]

Table S2 – HA sequences used for Fig. 1E – related to Figure 1

| <b>H1N1 Viruses</b>     |                              |
|-------------------------|------------------------------|
| A/South Carolina/1/1918 | A/Colorado/14/2012           |
| A/Wilson-Smith/1933     | A/Lisboa_PT/137/2013         |
| A/Puerto Rico/8/1934    | A/Jordan/30219/2014          |
| A/Alaska/1935           | A/Novosibirsk/49/2015        |
| A/Henry/1936            | A/Laos/F2804/2016            |
| A/Hickox/1940           | A/Singapore/GP1206/2017      |
| A/Bel/1942              | A/Vermont/18/2018            |
| A/Weiss/1943            | A/California/222/2019        |
| A/AA/Huston/1945        | A/New_York/04/2020           |
| A/Melbourne/1-MA/1946   | A/Auckland/584/2000          |
| A/Fort Monmouth/1/1947  | A/New York/312/2001          |
| A/Albany/4835/1948      | A/New York/494/2002          |
| A/Roma/1949             | A/Michigan/4/2003            |
| A/Albany/4836/1950      | A/Denmark/16/2004            |
| A/Albany/14/1951        | A/Hamburg/1/2005             |
| A/Malaya/302/1954       | A/Berlin/6/2006              |
| A/Denver/1957           | A/Cambodia/17/2007           |
| A/Wisconsin/301/1976    | A/Florida/18/2008            |
| A/Hong Kong/117/1977    | A/Athens.GR/10043/2009       |
| A/Memphis/13/1978       | A/New York/3835/2010         |
| A/Kiev/59/1979          | A/Rio Grande do Sul/360/2011 |
| A/India/6263/1980       | A/Siena/10/1989              |
| A/Baylor/4052/1981      | A/Maryland/12/1991           |
| A/Baylor/11515/1982     | A/Wisconsin/4754/1994        |
| A/Memphis/3/1983        | A/New York/620/1995          |
| A/Memphis/1/1984        | A/Nanchang/17/1996           |
| A/Mongolia/231/1985     | A/Taiwan/3355/1997           |
| A/New York/2924-1/1986  | A/Hong Kong/1035/1998        |
| A/Siena/4/1987          | A/New Caledonia/20/1999      |
| A/Ohio/3559/1988        |                              |
