# Supplementary material
Source: PubMed Central journal article supplement (PMC9474600)
Supplement: NIHMS1825836-supplement-Table_s3.pdf [file NIHMS1825836-supplement-Table_s3.pdf]

Table S3 – HC2 mouse and human germline on-target antibody affinities for the HA stalk – related to Figures 2 and 7

|        | Fab       | KD (M)   | Ka (1/Ms) | ka error | Kd (1/s) | Kd error |
|--------|-----------|----------|-----------|----------|----------|----------|
| Human  | F69_h01   | [>100uM] | 1.06E+02  | 7.52E+01 | 1.63E-02 | 2.89E-04 |
|        | F69_h02   | 1.55E-05 | 3.59E+02  | 5.82E+01 | 5.55E-03 | 4.90E-05 |
|        | F69_h03   | 2.71E-05 | 7.71E+02  | 3.42E+02 | 2.09E-02 | 4.83E-04 |
|        | F69_h33   | 5.85E-07 | 6.20E+04  | 2.34E+03 | 3.63E-02 | 1.24E-03 |
|        | F69_h41   | 9.16E-06 | 6.50E+02  | 5.89E+01 | 5.95E-03 | 4.85E-05 |
|        | F69_h105  | 8.44E-06 | 1.09E+03  | 2.32E+02 | 9.20E-03 | 1.75E-04 |
|        | F69_h127  | 1.58E-05 | 2.24E+03  | 4.23E-02 | 3.55E-02 | 6.00E-04 |
|        | F69_h130  | [>100uM] | 2.76E+01  | 2.51E+02 | 4.89E-03 | 1.50E-04 |
|        | F69_h133  | 1.23E-05 | 1.41E+03  | 1.73E+03 | 1.74E-02 | 7.45E-04 |
|        | L69_h3    | 2.69E-05 | 6.98E+02  | 2.05E+02 | 1.87E-02 | 4.32E-04 |
|        | L69_h7    | 1.01E-05 | 6.58E+02  | 7.27E+01 | 6.61E-03 | 6.53E-05 |
|        | L69_h25   | 6.71E-06 | 4.35E+02  | 6.05E+01 | 2.92E-03 | 2.16E-05 |
|        | L69_h33   | 9.36E-06 | 2.54E+04  | 3.16E+03 | 2.38E-01 | 6.23E-03 |
|        | L69_h124  | 5.23E-06 | 1.31E+04  | 1.19E+03 | 6.83E-02 | 1.72E-03 |
|        | L69_h127  | 5.80E-06 | 4.75E+04  | 2.96E+03 | 2.76E-01 | 4.97E-03 |
|        | L69_h128  | 5.87E-06 | 6.86E+02  | 5.83E+01 | 4.03E-03 | 4.09E-05 |
|        | HC2 Mouse | F69_12   | 1.17E-05  | 7.98E+02 | 1.42E+02 | 9.36E-04 |
| F69_19 |           | [>100uM] | 1.74E+02  | 1.74E+02 | 1.79E-02 | 5.01E-04 |
| F69_34 |           | 1.71E-05 | 3.05E+02  | 2.88E+01 | 5.21E-03 | 4.79E-05 |
| F69_37 |           | 2.31E-05 | 2.26E+02  | 2.95E+01 | 5.23E-03 | 2.52E-05 |
| F69_60 |           | 3.10E-05 | 3.72E+02  | 1.07E+02 | 1.15E-02 | 1.14E-04 |
| F69_74 |           | 8.20E-06 | 3.78E+02  | 2.45E+01 | 3.10E-03 | 1.66E-05 |
| L69_25 |           | 7.97E-06 | 4.50E+02  | 7.34E+01 | 3.59E-03 | 5.15E-05 |
| L69_27 |           | 8.61E-06 | 5.74E+02  | 4.25E+01 | 4.94E-03 | 3.49E-05 |
| L69_36 |           | 1.75E-05 | 2.45E+02  | 3.17E+01 | 4.27E-03 | 2.62E-05 |
| L69_71 |           | 2.02E-06 | 1.43E+03  | 3.10E+01 | 2.89E-03 | 2.31E-05 |
| L69_88 |           | 2.21E-06 | 3.71E+04  | 2.20E+03 | 8.20E-02 | 2.73E-03 |
