# Supplementary material
Source: PubMed Central journal article supplement (PMC9474600)
Supplement: NIHMS1825836-supplement-Table_s4.pdf [file NIHMS1825836-supplement-Table_s4.pdf]

Table S4 – HC2 mouse and human germline on-target stalk mAbs – related to Figures 2, 4, 7, S4, S5, S6 and S7

| Monoclonal |    | Sequence                                                                                                                             |
|------------|----|--------------------------------------------------------------------------------------------------------------------------------------|
| F69_12     | HC | QVQLVQSGAEVKKPGSSVKVSKASGGTFSSYAISWVRQAPQGLEWMGGIIPFPGTANYAQKFQGRVTITADESTSTAYMELSSLRSEDTAVYYCAR<br>GGGYYGSGSYDYWGQGLTVTVSS          |
|            | LC | DVLTQTPLSLPVSLGDAQASISCRSSQSIVHSNGNTYLEWYLQKPGQSPKLLIYKVSNRFSGVPDRFSGSGSGTDFTLTKISRVEAEDLGVIYCFQGS<br>VPRTFGGGTKLEIK                 |
| F69_19     | HC | QVQLVQSGAEVKKPGSSVKVSKASGGTFSSYAISWVRQAPQGLEWMGGIIPFPGTANYAQKFQGRVTITADESTSTAYMELSSLRSEDTAVYYCAR<br>GYSSSSYYYYGMDVWGQGTTVTVSS        |
|            | LC | QAVVTQESALTTSPGETVTLTCSRSTGAVTTSNYANWVQEKPDHLFTGLIGGTNNRAPGVPARFSGSLIGDKAALITGAQTEDEAIYFCALWYSNHW<br>VFGGGTKLTVL                     |
| F69_47     | HC | QVQLVQSGAEVKKPGSSVKVSKASGGTFSSYAISWVRQAPQGLEWMGGIIPFPGTANYAQKFQGRVTITADESTSTAYMELSSLRSEDTAVYYCAR<br>DYYGSAEDYWQGLTVTVSS              |
|            | LC | QLVLTQSPAIMSASPEKVTMTCSASSSVSYMHWYQQKSGTSPKRWIYDTSKLAGVPARFSGSGSGTSYSLTISMEAEADAATYYCQQWSSNPRTFG<br>GGTKLEIK                         |
| F69_60     | HC | QVQLVQSGAEVKKPGSSVKVSKASGGTFSSYAISWVRQAPQGLEWMGGIIPFPGTANYAQKFQGRVTITADESTSTAYMELSSLRSEDTAVYYCAR<br>YYYGSGSYYYYYGMDVWGQGTTVTVSS      |
|            | LC | DVLTQTPLSLPVSLGDAQASISCRSSQSIVHSNGNTYLEWYLQKPGQSPKLLIYKVSNRFSGVPDRFSGSGSGTDFTLTKISRVEAEDLGVIYCFQGS<br>VPRTFGGGTKLEIK                 |
| F69_74     | HC | QVQLVQSGAEVKKPGSSVKVSKASGGTFSSYAISWVRQAPQGLEWMGGIIPFPGTANYAQKFQGRVTITADESTSTAYMELSSLRSEDTAVYYCAR<br>APDYGSGSYDYWGQGLTVTVSS           |
|            | LC | DIQMTQTPSSLSASLGERVSLTCRASQDIGSSLNWLQQEPDGTIKRLIYATSSLDGVPKRFSGSRSGSDYSLTISSELEDFVDYCYLQYASSPFTF<br>GSGTKLEIK                        |
| F69_81     | HC | QVQLVQSGAEVKKPGSSVKVSKASGGTFSSYAISWVRQAPQGLEWMGGIIPFPGTANYAQKFQGRVTITADESTSTAYMELSSLRSEDTAVYYCAR<br>YYYGSGSPLYYYYYGMDVWGQGTTVTVSS    |
|            | LC | DIQMTQSPSSLSASLGGKVTITCKASQDINKYIAWYQHKPGKPRLLIHYTSTLQPGIPSRFSGSGSGRDYFSFISINLEPEDIATYYCLQYDNLTYTFG<br>GGTKLEIK                      |
| F69_79     | HC | QVQLVQSGAEVKKPGSSVKVSKASGGTFSSYAISWVRQAPQGLEWMGGIIPFPGTANYAQKFQGRVTITADESTSTAYMELSSLRSEDTAVYYCAR<br>KGYSSSYFYDYWGQGLTVTVSS           |
|            | LC | ELVLTQSPAITAASLGQKVTITCSASSSVSYMHWYQQKSGTSPKRWIYEISKLAGVPARFSGSGSGTSYSLTISMEAEADAIYYCQQWNYPLYTYFG<br>GGTKLEIK                        |
| F69_34     | HC | QVQLVQSGAEVKKPGSSVKVSKASGGTFSSYAISWVRQAPQGLEWMGGIIPFPGTANYAQKFQGRVTITADESTSTAYMELSSLRSEDTAVYYCAR<br>SSNYGSGSYNYWGQGLTVTVSS           |
|            | LC | DIVLTQSHKFMSTSVGDRVSIITCKASQDVSTAVAWYQQKPGQSPKLLIYASARYTGVDRFTGSGSGTDFTFTISSVQAEDLAVYYCQQHYSTPRTF<br>GGTKLEIK                        |
| F69_37     | HC | QVQLVQSGAEVKKPGSSVKVSKASGGTFSSYAISWVRQAPQGLEWMGGIIPFPGTANYAQKFQGRVTITADESTSTAYMELSSLRSEDTAVYYCAR<br>GGYYGSGSYPFYDYWGQGLTVTVSS        |
|            | LC | DIQMTQSPSSLSASLGERVSLTCRASQEIISGYLSWLQQKPDGTIKRLIYAASTLDGVPKRFSGSRSGSDYSLTISSELEDFADYCYLQYASYPWTF<br>GGTKLEIK                        |
| L69_70     | HC | QVQLVQSGAEVKKPGSSVKVSKASGGTFSSYAISWVRQAPQGLEWMGRIIPILGIANYAQKFQGRVTITADKSTSTAYMELSSLRSEDTAVYYCAR<br>DQNCSCGGSCYFYYYYYGMDVWGQGTTVTVSS |
|            | LC | DIVMTQSPSSLSAMSVGQKVTMSCKSSQSLNLSNQKNYLAWYQQKPGQSPKLLVYFASTRESGVPDRFIGSGSGTDFTLTISSVQAEDLADYFCQQHY<br>STPPTFGAGTKLEIK                |
| L69_59     | HC | QVQLVQSGAEVKKPGSSVKVSKASGGTFSSYAISWVRQAPQGLEWMGRIIPILGIANYAQKFQGRVTITADKSTSTAYMELSSLRSEDTAVYYCAR<br>EGARDAFDIWGQGTMTVTVSS            |
|            | LC | DIVLTQSPSSLSVSAAGEKVTMSCKSSQSLNLSNQKNYLAWYQQKPGQPPKLLIYGASTRESGVPDRFTGSGSGTDFTLTISSVQAEDLAVYYCQNDH<br>SYPPTFGSGTKLEIK                |
| L69_71     | HC | QVQLVQSGAEVKKPGSSVKVSKASGGTFSSYAISWVRQAPQGLEWMGRIIPILGIANYAQKFQGRVTITADKSTSTAYMELSSLRSEDTAVYYCAR<br>DSSSQYYYYYGGMDVWGQGTTVTVSS       |
|            | LC | DVVMQTPLSLPVSLGDAQASISCRSSQSLVHSNGNTYLHWYLQKPGQSPKLLIYKVSNRFSGVPDRFSGSGSGTDFTLTKISRVEAEDLGVIYFCQSTH<br>VPPTFGGGTKLEIK                |
| L69_4      | HC | QVQLVQSGAEVKKPGSSVKVSKASGGTFSSYAISWVRQAPQGLEWMGRIIPILGIANYAQKFQGRVTITADKSTSTAYMELSSLRSEDTAVYYCAR<br>EGTMVRGVIITFDYWGQGLTVTVSS        |
|            | LC | DIQMTQTSLSASLGDVITISCRASQDISNYLNWYQQKPDGTVKLLIYYTSSLHSGVPSRFSGSGSGTDYSLTISNLEQEDIATYFCQQGNTLPPWT<br>FGGGTKLEIK                       |
| L69_8      | HC | QVQLVQSGAEVKKPGSSVKVSKASGGTFSSYAISWVRQAPQGLEWMGRIIPILGIANYAQKFQGRVTITADKSTSTAYMELSSLRSEDTAVYYCAR<br>ENYSGSYNGGAFDIWGQGTMTVTVSS       |
|            | LC | DIQMTQSPSSLSASLGGKVTITCKASQDINKYIAWYQHKPGKPRLLIHYTSTLQPGIPSRFSGSGSGRDYFSFISINLEPEDIATYYCLQYDNLWTFG<br>GGTKLEIK                       |
| L69_9      | HC | QVQLVQSGAEVKKPGSSVKVSKASGGTFSSYAISWVRQAPQGLEWMGRIIPILGIANYAQKFQGRVTITADKSTSTAYMELSSLRSEDTAVYYCAR<br>EGVAAAGTPDFDYWGQGLTVTVSS         |
|            | LC | DIVLTQSPATLSVTPGDSVLSCRASQISNNLHWYQQKSHESPRLLIKYASQISGIPSRFSGSGSGTDFTLSINSVETEDFGMYFCQQSNSWPFTF<br>GSGTKLEIK                         |
| L69_25     | HC | QVQLVQSGAEVKKPGSSVKVSKASGGTFSSYAISWVRQAPQGLEWMGRIIPILGIANYAQKFQGRVTITADKSTSTAYMELSSLRSEDTAVYYCAR<br>YGGSGSYFYDYWGQGLTVTVSS           |
|            | LC | QLVLTQSPAIMSASPEKVTMTCSASSSVSYMHWYQQKSGTSPKRWIYDTSKLAGVPARFSGSGSGTSYSLTISMEAEADAATYYCQQWSSNPFTFG<br>AGTKLEIK                         |
| L69_36     | HC | QVQLVQSGAEVKKPGSSVKVSKASGGTFSSYAISWVRQAPQGLEWMGRIIPILGIANYAQKFQGRVTITADKSTSTAYMELSSLRSEDTAVYYCAR<br>GGGTTSSYYYYGMDVWGQGTTVTVSS       |
|            | LC | DIVLTQSPAILSVSPGERVFSFSCRASQSIGTSHWYQRTNGSPRLLIKYASEISGIPSRFSGSGSGTDFTLSINSVEEDIADYCYCQQSNSWPFTF<br>GSGTKLEIK                        |

Table S4 continued

| Monoclonal |    | Sequence                                                                                                                                 |
|------------|----|------------------------------------------------------------------------------------------------------------------------------------------|
| L69_80     | HC | QVQLVQSGAEVKKPKGSSVKVSKASGGTFSSYAISWVRQAPQGLEWMGRIIPILGIANYAQKFQGRVTITADKSTSTAYMELSSLRSEDTAVYYCAR<br>YYYGSGSYNVIDAFDIWGQTMVTVSS          |
|            | LC | DIVLTQSPAILLSVSPGERVFSFCRASQSIGTSHWYQQRNGSPRLLIKYASESISGIPSRFSGSGSGTDFTLTINSVESEDIADYYCQQSNWPLTF<br>GAGTKLEIK                            |
| L69_88     | HC | QVQLVQSGAEVKKPKGSSVKVSKASGGTFSSYAISWVRQAPQGLEWMGRIIPILGIANYAQKFQGRVTITADKSTSTAYMELSSLRSEDTAVYYCAR<br>WGVGSGSSYYYYGMDVWGQTTVTVSS          |
|            | LC | DIKMTQSPSSMYASLGERVTITCKASQDINSYLSWFQQKPGKSPKTLIYRANRLVDGVP SRFSGSGSQDYSLTISLSEYEDMGIIYCLQYDELYTFG<br>GGTKLEIK                           |
| L69_27     | HC | QVQLVQSGAEVKKPKGSSVKVSKASGGTFSSYAISWVRQAPQGLEWMGRIIPILGIANYAQKFQGRVTITADKSTSTAYMELSSLRSEDTAVYYCAS<br>RITMVRGLDYGQGTLVTVSS                |
|            | LC | DIVLTQSPSSLTVTAGEKVTMSCKSSQSLNLSGNQKNYLTWYQQKPGQPPKLLIYWASTRESGVPDRFTGSGSGTDFTLTISSVQAEDLAVYYCQNDY<br>SYPTFGSGTKLEIK                     |
| F69_h20    | HC | QVQLVQSGAEVKKPKGSSVKVSKASGGTFSSYAISWVRQAPQGLEWMGGIIPIFGTANYAQKFQGRVTITADESTSTAYMELSSLRSEDTAVYYCAS<br>TSYYDSSGYPYPRWFDPWGQGTLVTVSS        |
|            | LC | DIVMTQSPATLSLSPGERATLSCRASQSVSSYLAWYQQKPGQAPRLLIYDASNRTGIPARFSGSGSGTDFTLTISLPEPDFAVYYCQQRSNWPPTF<br>GPGTKVDIK                            |
| F69_h105   | HC | QVQLVQSGAEVKKPKGSSVKVSKASGGTFSSYAISWVRQAPQGLEWMGGIIPIFGTANYAQKFQGRVTITADESTSTAYMELSSLRSEDTAVYYCAR<br>GGWGYCSGGSCYSGFRYWGQGTLVTVSS        |
|            | LC | DIVMTQSPSSLSASVGDVRTITCQASQDISNYLNWYQQKPGKAPKLLIYDASNLETGVP SRFSGSGSGTDFFTISSLQPEDIATYYCQQYDNLPPIT<br>FGQGTRELIK                         |
| F69_h110   | HC | QVQLVQSGAEVKKPKGSSVKVSKASGGTFSSYAISWVRQAPQGLEWMGGIIPIFGTANYAQKFQGRVTITADESTSTAYMELSSLRSEDTAVYYCAR<br>LNAEPVYYYYYMDVWGKGTTVTVSS           |
|            | LC | DIVMTQSPGTLSPGERATLSCRASQSVSSYLAWYQQKPGQAPRLLIYGASSRATGIPDRFSGSGSGTDFTLTISRLEPDFAVYYCQQYGSPPYT<br>FGQGTRELIK                             |
| F69_h117   | HC | QVQLVQSGAEVKKPKGSSVKVSKASGGTFSSYAISWVRQAPQGLEWMGGIIPIFGTANYAQKFQGRVTITADESTSTAYMELSSLRSEDTAVYYCAR<br>QYYDSSGYYRWFDPWGQGTLVTVSS           |
|            | LC | DIVMTQSPSSLSASVGDVRTITCRASQGISNYLAWFQQKPGKAPKSLIYAASSLQSGVPSKFSGSGSGTDFTLTISLQPEDFATYYCQQYNSYPYTF<br>GQGTRELIK                           |
| F69_h33    | HC | QVQLVQSGAEVKKPKGSSVKVSKASGGTFSSYAISWVRQAPQGLEWMGGIIPIFGTANYAQKFQGRVTITADESTSTAYMELSSLRSEDTAVYYCAR<br>GSSSSYYYYYMDVWGQGTTVTVSS            |
|            | LC | DIVMTQSPGTLSPGERATLSCRASQSVSSYLAWYQQKPGQAPRLLIYGASSRATGIPDRFSGSGSGTDFTLTISRLEPDFAVYYCQQYGSPLT<br>FGGKVEIK                                |
| F69_h41    | HC | QVQLVQSGAEVKKPKGSSVKVSKASGGTFSSYAISWVRQAPQGLEWMGGIIPIFGTANYAQKFQGRVTITADESTSTAYMELSSLRSEDTAVYYCAS<br>HQGYSSSPFHGWGQGTLVTVSS              |
|            | LC | DIVMTQSPATLSVSPGERATLSCRASQSVSSNLAWYQQKPGQAPRLLIYGASTRATGIPARFSGSGSGTEFTLTISLQSEDFAVYYCQQYNNWPLTF<br>GGTKVEIK                            |
| F69_h107   | HC | QVQLVQSGAEVKKPKGSSVKVSKASGGTFSSYAISWVRQAPQGLEWMGGIIPIFGTANYAQKFQGRVTITADESTSTAYMELSSLRSEDTAVYYCAP<br>YCSSTSCRGWGQGTLVTVSS                |
|            | LC | DIVMTQSPATLSVSPGERATLSCRASQSVSSNLAWYQQKPGQAPRLLIYGASTRATGIPARFSGSGSGTEFTLTISLQSEDFAVYYCQQYNNWPPSY<br>TFGQGTRELIK                         |
| F69_h127   | HC | QVQLVQSGAEVKKPKGSSVKVSKASGGTFSSYAISWVRQAPQGLEWMGGIIPIFGTANYAQKFQGRVTITADESTSTAYMELSSLRSEDTAVYYCAR<br>EDGWQLIGGNFDYWGQGTLVTVSS            |
|            | LC | QSALTQPRSVSGSPGQSVTISCTGTSSDVGNYVSWYQQHPGKAPKLMIDVSKRPSGVPDRFSGSKSGNTASLTISGLQAEDEADYCCSYAGSYV<br>FTGTKVTVL                              |
| F69_h130   | HC | QVQLVQSGAEVKKPKGSSVKVSKASGGTFSSYAISWVRQAPQGLEWMGGIIPIFGTANYAQKFQGRVTITADESTSTAYMELSSLRSEDTAVYYCAR<br>GSWGAGTYFDYWGQGTLVTVSS              |
|            | LC | DIVMTQSPGTLSPGERATLSCRASQSVSSYLAWYQQKPGQAPRLLIYGASSRATGIPDRFSGSGSGTDFTLTISRLEPDFAVYYCQQYGSPPQT<br>FGQGTRELIK                             |
| F69_h133   | HC | QVQLVQSGAEVKKPKGSSVKVSKASGGTFSSYAISWVRQAPQGLEWMGGIIPIFGTANYAQKFQGRVTITADESTSTAYIELSSLRSEDTAVYYCAS<br>RSDIVVVPAAIQGAGGYYYYYMDVWGKGTTVTVSS |
|            | LC | DVVMTQSPSLPVTLLGQPASISCRSSQLVYSDGNTYLNWFQQRPGQSPRLLIYKVSNRDSGVPDRFSGSGSGTDFTLKISRVEAEDVGFYCMQGTH<br>WPPTFGQGTRELIK                       |
| F69_h147   | HC | QVQLVQSGAEVKKPKGSSVKVSKASGGTFSSYAISWVRQAPQGLEWMGGIIPIFGTANYAQKFQGRVTITADESTSTAYMELSSLRSEDTAVYYCAR<br>VRTQDIVVVPAAADAFDIWGQTMVTVSS        |
|            | LC | DIVMTQSPSTLSASVGDVRTITCRASQSISSWLAWYQQKPGKAPKLLIYKASSLESQVPSRFSGSGSGTEFTLTISLQPDFATYYCQQYNSYSWTF<br>GQGTRELIK                            |
| F69_h163   | HC | QVQLVESGAEVKKPKGSSVKVSKASGGTFSSYAISWVRQAPQGLEWMGGIIPIFGTANYAQKFQGRVTITADESTSTAYMELSSLRSEDTAVYYCAR<br>VSGYSSSWYLTGVDYWGQGTLVTVSS          |
|            | LC | DIVMTQSPATLSVSPGERATLSCRASQSVSSNLAWYQQKPGQAPRLLIYGASTRATGIPARFSGSGSGTEFTLTISLQSEDFAVYYCQQYNNWPRTF<br>GQGTRELIK                           |
| F69_h01    | HC | QVQLVQSGAEVKKPKGSSVKVSKASGGTFSSYAISWVRQAPQGLEWMGGIIPIFGTANYAQKFQGRVTITADESTSTAYMELSSLRSEDTAVYYCAR<br>QYYDSSGYYRWFDPWGQGTLVTVSS           |
|            | LC | DIVMTQSPSSLSASVGDVRTITCRASQGISNYLAWFQQKPGKAPKSLIYAASSLQSGVPSKFSGSGSGTDFTLTISLQPEDFATYYCQQYNSYPYTF<br>GQGTRELIK                           |
| F69_h02    | HC | QVQLVQSGAEVKKPKGSSVKVSKASGGTFSSYAISWVRQAPQGLEWMGGIIPIFGTANYAQKFQGRVTITADESTSTAYMELSSLRSEDTAVYYCAR<br>QYYDSSGYYRWFDPWGQGTLVTVSS           |
|            | LC | DIQMTQSPSSLSASVGDVRTITCQASQDISNYLNWYQQKPGKAPKLLIYDASNLETGVP SRFSGSGSGTDFFTISSLQPEDIATYYCQQYDNLPPIT<br>FGQGTRELIK                         |

Table S4 continued

| Monoclonal |    | Sequence                                                                                                                             |
|------------|----|--------------------------------------------------------------------------------------------------------------------------------------|
| F69_h03    | HC | QVQLVQSGAEVKKPGSSVKVSKASGGTFSSYAISWVRQAPQGLEWMGGIIPILFGTANYAQKFQGRVTITADESTSTAYMELSSLRSEDTAVYYCAR<br>KNYYDSSGLDVWGKGTITVTVSS         |
|            | LC | DIVMTQSPGTLSPGERATLSCRASQSVSSSYLAWYQQKPGQAPRLLIYGASSRATGIPDRFSGSGSGTDFTLTISRLEPEDFAVYYCQQYGSPPY<br>TFGGGTKLEIK                       |
| L69_h47    | HC | QVQLVQSGAEVKKPGSSVKVSKASGGTFSSYISWVRQAPQGLEWMGRIIPILGIANYAQKFQGRVTITADKSTSTAYMELSSLRSEDTAVYYCAR<br>GDGNSYYYYYGMVDVWGQGTITVTVSS       |
|            | LC | DIVMTQSPATLSVSPGERATLSCRASQSVSSNLAWYQQKPGQAPRLLIYGASTRATGIPARFSGSGSGTEFTLTISLQSEDFAVYYCQQYNNWLWTF<br>GQGTKVEIK                       |
| L69_h124   | HC | QVQLVQSGAEVKKPGSSVKVSKASGGTFSSYISWVRQAPQGLEWMGRIIPILGIANYAQKFQGRVTITADKSTSTAYMELSSLRSEDTAVYYCAR<br>VLYGSGSYNDYDWGQGTITVTVSS          |
|            | LC | DIVMTQSPATLSVSPGERATLSCRASQSVSSNLAWYQQKPGQAPRLLIYGASTRATGIPARFSGSGSGTEFTLTISLQSEDFAVYYCQQYNNWLYTF<br>GQGTKLEIK                       |
| L69_h128   | HC | QVQLVQSGAEVKKPGSSVKVSKASGGTFSSYISWVRQAPQGLEWMGRIIPILGIANYAQKFQGRVTITADKSTSTAYMELSSLRSEDTAVYYCAR<br>ERLLLDYYYYMDVWGKGTITVTVSS         |
|            | LC | DIVMTQSPATLSVSPGERATLSCRASQSVSSNLAWYQQKPGQAPRLLIYGASTRATGIPARFSGSGSGTEFTLTISLQSEDFAVYYCQQYNNWPYTF<br>GQGTKLEIK                       |
| L69_h164   | HC | QVQLVESGAEVKKPGSSVKVSKASGGTFSSYISWVRQAPQGLEWMGRIIPILGIANYAQKFQGRVTITADKSTSTAYMELSSLRSEDTAVYYCAR<br>DSDGYDSSGYPFHYWGQGTITVTVSS        |
|            | LC | DIVMTQSPATLSVSPGERATLSCRASQSVSSNLAWYQQKPGQAPRLLIYGASTRATGIPARFSGSGSGTEFTLTISLQSEDFAVYYCQQYNNWLYTF<br>GQGTKLEIK                       |
| L69_h149   | HC | QVQLVQSGAEVKKPGSSVKVSKASGGTFSSYISWVRQAPQGLEWMGRIIPILGIANYAQKFQGRVTITADKSTSTAYMELSSLRSEDTAVYYCLY<br>CSGGSCYSEDFDPWGQGTITVTVSS         |
|            | LC | DIVMTQSPATLSVSPGERATLSCRASQSVSSNLAWYQQKPGQAPRLLIYGASTRATGIPARFSGSGSGTEFTLTISLQSEDFAVYYCQQYNNWLYTF<br>GQGTKLEIK                       |
| L69_h25    | HC | QVQLVESGAEVKKPGSSVKVSKASGGTFSSYISWVRQAPQGLEWMGRIIPILGIANYAQKFQGRVTITADKSTSTAYMELSSLRSEDTAVYYCAR<br>DSDYDSSGTPWGQGTITVTVSS            |
|            | LC | DIVMTQSPSSLSASVGDRTITCRASQIRNDLGWYQQKPGKAPKRLIYAASSLQSGVPSRFSGSGSGTEFTLTISLQPEDFATYYCLQHSYRWTF<br>GQGTKVEIK                          |
| L69_h14    | HC | QVQLVQSGAEVKKPGSSVKVSKASGGTFSSYISWVRQAPQGLEWMGRIIPILGIANYAQKFQGRVTITADKSTSTAYMELSSLRSEDTAVYYCAS<br>SSSGATGDYWGQGTITVTVSS             |
|            | LC | DIVMTQSPATLSLSPGERATLSCRASQSVSSYLAWYQQKPGQAPRLLIYDASNATGIPARFSGSGSGTDFTLTISLQSEDFAVYYCQQRSNWLFTF<br>GPGTKVDIK                        |
| L69_h1     | HC | QVQLVQSGAEVKKPGSSVKVSKASGGTFSSYISWVRQAPQGLEWMGRIIPILGIANYAQKFQGRVTITADKSTSTAYMELSSLRSEDTAVYYCAR<br>SGYCSSTSCYVAYYYYGMVDVWGKGTITVTVSS |
|            | LC | DVVMTQSPPLSLPVTTLGQPASISCRSSQSLVHSDGNTYLNWFQQRPGQSPRLIYKVSNRDSGVPDRFSGSGSGTDFTLTKISRVEAEDGVYYCMQGTH<br>WPSFGPGTKVDIK                 |
| L69_h3     | HC | QVQLVQSGAEVKKPGSSVKVSKASGGTFSSYISWVRQAPQGLEWMGRIIPILGIANYAQKFQGRVTITADKSTSTAYMELSSLRSEDTAVYYCAK<br>TLNSGYNGAYDWGQGTITVTVSS           |
|            | LC | DIVMTQSPATLSVSPGERATLSCRASQSVSSNLAWYQQKPGQAPRLLIYGASTRATGIPARFSGSGSGTEFTLTISLQSEDFAVYYCQQYNNWPQTF<br>GQGTKVEIK                       |
| L69_h5     | HC | QVQLVQSGAEVKKPGSSVKVSKASGGTFSSYISWVRQAPQGLEWMGRIIPILGIANYAQKFQGRVTITADKSTSTAYMELSSLRSEDTAVYYCAS<br>YCSGGSCQDAFDIWIWQGTITVTVSS        |
|            | LC | DIVMTQSPSSLSASVGDRTITCRASQSISSYLNWYQQKPGKAPKLLIYAASSLQSGVPSRFSGSGSGTDFTLTISLQPEDFATYYCQQSYSTPLTF<br>GGGTKVEIK                        |
| L69_h7     | HC | QVQLVQSGAEVKKPGSSVKVSKASGGTFSSYISWVRQAPQGLEWMGRIIPILGIANYAQKFQGRVTITADKSTSTAYMELSSLRSEDTAVYYCAR<br>DRDQVTMVQGVKPTPDNDYWGQGTITVTVSS   |
|            | LC | DIVMTQSPSSLSASVGDRTITCRASQSISSYLNWYQQKPGKAPKLLIYAASSLQSGVPSRFSGSGSGTDFTLTISLQPEDFATYYCQQSYSTPFTF<br>GPGTKVDIK                        |
| L69_h33    | HC | QVQLVQSGAEVKKPGSSVKVSKASGGTFSSYISWVRQAPQGLEWMGRIIPILGIANYAQKFQGRVTITADKSTSTAYMELSSLRSEDTAVYYCAR<br>AAAAGYYYYYGMVDVWGKGTITVTVSS       |
|            | LC | DIVMTQSPSSLSASVGDRTITCRASQSISSYLNWYQQKPGKAPKLLIYAASSLQSGVPSRFSGSGSGTDFTLTISLQPEDFATYYCQQSYSTPPAF<br>GQGTKVEIK                        |
| L69_h44    | HC | QVQLVQSGAEVKKPGSSVKVSKASGGTFSSYISWVRQAPQGLEWMGRIIPILGIANYAQKFQGRVTITADKSTSTAYMELSSLRSEDTAVYYCAS<br>EYSSSGFDYWGQGTITVTVSS             |
|            | LC | DIVMTQSPSSLSASVGDRTITCRASQSISSYLNWYQQKPGKAPKLLIYAASSLQSGVPSRFSGSGSGTDFTLTISLQPEDFATYYCQQSYSTLPYT<br>FGQGTKLEIK                       |
| L69_h127   | HC | QVQLVQSGAEVKKPGSSVKVSKASGGTFSSYAISWVRQAPQGLEWMGRIIPILGIANYAQKFQGRVTITADKSTSTAYMELSSLRSEDTAVYYCAR<br>DRYSSGWLVDYWGQGTITVTVSS          |
|            | LC | DIVMTQSPATLSVSPGERATLSCRASQSVSSNLAWYQQKPGQAPRLLIYGASTRATGIPARFSGSGSGTEFTLTISLQSEDFAVYYCQQYNNWLRGF<br>GQGTKVEIK                       |
