# Supplementary material
Source: PubMed Central journal article supplement (PMC9474600)
Supplement: NIHMS1825836-supplement-Table_S6.pdf [file NIHMS1825836-supplement-Table_S6.pdf]

Table S6 – HC2 mouse and human stalk mAbs expanded after vaccination– related to Figures 6 and 7

| Monoclonal |    | Sequence                                                                                                                       |
|------------|----|--------------------------------------------------------------------------------------------------------------------------------|
| L69_m34    | HC | QVQLVQSGAEVKKPGSSSVKVSCKASGGTFSSYAISWVRQAPGQGLEWMGRIIPILGIVNYAQKFQGRVTITADKSTSTAHMELSSLRYEDTAVYYCAR<br>EAGSGSYNYWGQGLTLTVSS    |
|            | LC | DIVLTQSPSSSLTMSVQKVTMSCKSSQSLLNSSNQKNYLAWYQQKPGQSPKLLVYFASTRESGVPDRFIGSGSGTDFTLTISSVQAEDLADYFCQQHY<br>STPWTFGGGTKLEIK          |
| L69_m30    | HC | QVQLVQSGAEVKKPGSSSVKVSCKASGGTFSTYAISWVRQAPGQGLEWMGRIIPFPGTVNYAQKFQGRVTITADESTTTAFLELSSLRSEDVAVYYCAR<br>EFLTGVFDYWGQGLTLTVSS    |
|            | LC | DIVLTQTPLSLPVSILGQVSISSCRSSQSIIVHSIRNTYLQWYLQKPGQSPKLLIYKVSNRFSGVPDRFSGSGSGTDFILKINRVEAEDLGVIYCFQGS<br>VPFTFGSGTKLEIK          |
| L69_m49    | HC | QVQLVQSGAEVKKPGSSSVKVSCKASGGTFSSYVISWVRQAPGQGLEWMGRIIPFLGLPNYAQHFQGRVTIIADTSTSTVYMELSSLRSEDVAVYYCVS<br>YSGSYNPNPFDYWGQGLTLTVSS |
|            | LC | DIVLTQTPLSLPVSILGDAQASISCRSSQSLVHSNGNTYLHWYLQKPGQSPKLLIYKVSRRFSGVPDRFSGSFGTDFTLKISRVEAEDLGVIYFCQSTH<br>FPPTFGAGTKLEIK          |
| L69_m56    | HC | QVQLVQSGAEVKKPGSSSVKVSCKASGGTFNNFAINWVRQAPGQGLEWMGRIIPILGMANYAQRFQGRVTITADRSTSTAYMELSSLRSEDVAVYYCAR<br>AGITGTDSFDIWLGLTMVTVSS  |
|            | LC | QAVVTQESALTTSPGGTVILTCRSSTGAVTTSNYANWVQEKPDHLFTGLIGGTSNRAPGVPVRFSGSLIGDKAALTITGAQTEDDAMYFCALWYSTHY<br>VFGGGTKVTVL              |
| L69_m76    | HC | QVQLVQSGAEVKKPGSSSVKVSCKASGGTFSSYGISWVRQAPGQGLEWMGRIIPFLGLPNYAQHFQGRVTITADTSTSTVHMELNSLRSEDVAVYYCVT<br>YSGSYNPNPFDYWGQGLTLTVSS |
|            | LC | DIVLTQTPLSLPISLGDQASISCRSSQSLVHSNGNTYLHWYLQKPGQSPKLLIYKVSRRFSGVPDRFSGSVSGTDFTLKISRVEAEDLGVIYFCQSTH<br>FPPTFGAGTKLEIK           |
| 310-39G10  | HC | QVQLVQSGAEVKKPGSSSVKVSCKASGGTFSSRYTISWVRQAPGQGLEWMGRISPIAGLENYAQKFQGRVTITADISTSTAYMELSSLRSDDTAVYYCAG<br>SSGYYQPPPYWGQGLTLTVSS  |
|            | LC | EIVLTQAPFSLSLSPGERATLSCRASQSVSSSSLAWYHQKPGQAPRLLIYGASSRATGIPDRFSGSGSGTDFTLTISRLEPEDFSLYYCQQYGSPLT<br>FGQGTREIK                 |
| 310-63E6   | HC | QVQLVQSGAEVKKPGSSSVKVSCTASGGTFSTYSFSWVRQAPGQGLEWMGRIVPIQGMTDYAQKFRGRVTITADKWTSTVYMEVTSRSEDVAVYYCAT<br>SRSMYFYQLDVWGRGTTTVSS    |
|            | LC | EIVLTQSPGTLSPGERATVSCRASQSVTSTFLAWYQQRPGQAPRLLIYGASSRATGIPDRFSGSGSEADFTLTINRLEPEDFAVYYCQQYATSPWT<br>FGQGTKVEIK                 |
